# Supplementary material for: High versus low energy administration in the early phase of acute pancreatitis (GOULASH trial): protocol of a multicentre randomised double-blind clinical trial
Source: PubMed Central journal article supplement — BMJ Open. 2017 Sep 14;7(9):e015874. doi: 10.1136/bmjopen-2017-015874 (PMC5722094; doi:10.1136/bmjopen-2017-015874), 2017-09-14
Supplement: bmjopen-2017-015874supp003.pdf [file bmjopen-2017-015874supp003.pdf]

## Questionnaire

**1. Patient personal details**

First name:.....

Last name: .....

GOULASH No:

(Automatically generated)

**2. Details from the medical history (in the last month)**

**Alcohol consumption:** yes / no  
 if yes: frequency: occasionally/monthly/weekly/daily  
 amount (g/day):.....

Guide for estimation of the amount:

1 dl beer (4.5 vol. %) = ~3.5 g alcohol

1 dl wine (12.5 vol. %) = ~10 g alcohol

1 dl hard drink (50 vol. %) = ~40 g alcohol

**Smoking:** yes / no  
 if yes: amount (cigarettes/day):.....

**Drug abuse:** yes / no *Prescribed medication should not be included here.*  
 if yes: type of drug:..... amount:.....  
*(if there are more drugs, please describe them in the NOTES section at the end)*

**Any re-hospitalization?:** yes / no

if yes: cholecystectomy: yes no  
 recurrent AP: yes no  
 other: .....

**Medications taken regularly in the last month:** yes / no

*Please specify the name of the active substance (e.g. "acetylsalicylic acid"). Please specify the amount using the International System of Units –SI (e.g. milligram, gram)*

if yes:  
 name:.....active substance:.....dose(gram,milligram, etc.).....  
 if fluid, concentration (e.g. 10%, 1g/2ml, etc.).....how many times per day (e.g. 3)  
 type of administration:.....other notes: .....

name:.....active substance:.....dose(gram,milligram, etc.).....  
 if fluid, concentration (e.g. 10%, 1g/2ml, etc.).....how many times per day (e.g. 3)  
 type of administration:.....other notes: .....

name:.....active substance:.....dose(gram,milligram, etc.).....  
 if fluid, concentration (e.g. 10%, 1g/2ml, etc.).....how many times per day (e.g. 3)  
 type of administration:.....other notes: .....

# FORM-C

## Acute Pancreatitis

# GOULASH

**Diet:** yes / no  
if yes: please describe:.....

### 3. Complains, symptoms

**Abdominal pain:** yes / no  
if yes: since when (hours):.....  
type: cramping / dull / sharp  
intensity (1-10):.....  
location: diffuse / localized  
Please mark the location!  
radiation:.....

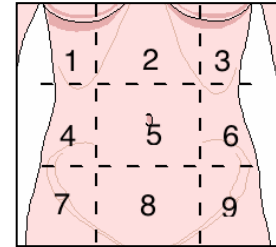

**Nausea:** yes / no

**Vomiting:** yes / no  
if yes: how many times:.....  
contents of cast:.....

**Subfebrility/fever:** yes / no  
if yes: since when:.....  
degree (°C):.....

**Appetite:** good / retained / bad

**Weight loss:** yes / no  
if yes: how much (kg):.....  
How long did it take? (weeks):.....

**Jaundice:** yes / no  
if yes: for how long:.....

**Stool:** normal / diarrhea / constipation / fatty / putrid / undigested food/bloody/mucus

### 4. Laboratory parameters

#### OBLIGATORY PARAMETERS

|                                    |  |
|------------------------------------|--|
| Amylase (U/l)                      |  |
| Lipase (U/l)                       |  |
| White blood cell (WBC) count (G/l) |  |
| Red blood cell (RBC) count (T/l)   |  |
| Hemoglobin (g/l)                   |  |
| Hematocrit (%)                     |  |
| Thrombocyte (G/l)                  |  |
| C-reactive protein (mg/l)          |  |

**OTHER PARAMETERS (if measured):**

|                                      |  |
|--------------------------------------|--|
| Serum glucose (mmol/l)               |  |
| Blood urea nitrogen (mmol/l)         |  |
| Creatinine (umol/l)                  |  |
| eGFR                                 |  |
| ASAT/GOT (U/l)                       |  |
| Lactate dehydrogenase LDH (U/l)      |  |
| Calcium (mmol/l)                     |  |
| Sodium (mmol/l)                      |  |
| Potassium (mmol/l)                   |  |
| Total protein (g/l)                  |  |
| Albumin (g/l)                        |  |
| Cholesterol (mmol/l)                 |  |
| Triglyceride (mmol/l)                |  |
| ALAT/GPT (U/l)                       |  |
| Gamma GT (U/l)                       |  |
| Total bilirubin (umol/l)             |  |
| Direct/Conjugated bilirubin (umol/l) |  |
| Alkaline phosphatase (U/l)           |  |

**5. Imaging examination**

**Abdominal ultrasonography:**                      yes                      no  
Description:

**Ultrasound:**

- **Visualization:**
  - Good, complete (head at least partially visualized, body and neck well visualized, tail: partially visualized)
  - Partially, incomplete (only body or only head visualized)
  - Poor, non-diagnostic
- **Size:**
  - Normal
  - Partially enlarged (body AP diameter is over 2 cm and/or head AP diameter is over 2,5 cm, none exceeds 3 cm)
  - Definitely enlarged (any part over 3 cm AP diameter)
- **Peripancreatic fluid:**
  - none
  - present
  - Large pseudocyst(s)

- Size of peripancreatic fluid or pseudocyst: ..... cm
- **Pancreas homogeneity:**
  - o Homogenous
  - o Inhomogeneous, includes area(s) of low echogenicity
  - o Inhomogeneous, includes calcifications
- In case of circumscribed low echogenicity area, it's size: ..... cm
- **Wirsung dilatation:** YES / NO (yes, diameter: ..... mm)

Other Description:

.....  
 .....

**Abdominal Computed Tomography:**    yes                      no  
 Modified CTSI Score:    .....0-10.....

*Please NOTE! Abdominal CT is compulsory if  
 - Abdominal ultrasonography is not fully completed OR  
 - There is any alteration on abdominal ultrasonography*

**CTSI Score: (I)** Normal pancreas 0 point, intrinsic pancreatic abnormalities with or without inflammatory changes in peripancreatic fat 2 points, Pancreatic or peripancreatic fluid collection or peripancreatic fat necrosis 4 points **(II)** Necrosis absent 0 Points, < 30% necrosis 2 Points, > 30% necrosis 4 points **(III)** presence of extrapancreatic findings 2 points.  
 MAXIMUM OF: 10 points

- **CTSI:**

**I. Pancreas**

- o Normal pancreas
- o Intrinsic pancreatic abnormalities with or without inflammatory changes in peripancreatic fat
- o pancreatic or peripancreatic fluid collection or peripancreatic fat necrosis

**II. Size of Necrosis**

- o Necrosis absent
- o < 30% necrosis
- o > 30% necrosis
- o > 60% necrosis

**III. Extrapancreatic findings**

- o presence of extrapancreatic findings

**DETAILED REPORT**

- **Pancreas Size:**

- o Normal
- o Partially enlarged (body AP diameter is over 2 cm and/or head AP diameter is over 2,5 cm, none exceeds 3 cm)

- Definitely enlarged (any part over 3 cm AP diameter)
- Largest diameter of peripancreatic **fat infiltration**: ..... cm
- **Peripancreatic fluid**:
  - none
  - present
  - Large pseudocyst(s)
- Size of peripancreatic fluid or pseudocyst: ..... cm
- **Necrotizing area** (nonenhancement):
  - Largest diameter of necrosis area: ..... cm
  - Location of necrosis: .....
  - Type: patchy / full width
  - Estimated necrosis: 0% , < 30% , 30% - 60%, above 60%
- **Wirsung** dilatation: YES / NO (yes, diameter: ..... mm)
- Distant **abdominal fluid**:
  - Small amount (hard to see, less than 2 cm in lesser pelvis, less than 1 cm around liver/spleen)
  - Moderate amount (easy to see, but without pelvic or abdominal distension)
  - Large amount with abdominal/pelvic distension
- **Pleural effusion**:
  - none
  - one sided:..... (AP diameter: ..... cm)
  - Both sides, L - ..... cm, R - ..... cm
- **Extrapancreatic findings**:
  - Inflammation (Cholecystitis, Duodenitis, etc.) location: .....
  - Cholecystolithiasis
  - Choledocholithiasis
  - Signs of bowel ischaemia
  - Bowel distension, ileus
  - Venous thrombosis
  - Pseudoaneurysm
  - Parenchymal organ involvement, define: .....

Other Description:

.....  
 .....

**6. Complications** *Please register pancreatic complication of fluid collection/pseudocyst/necrosis only if you had imaging proof on the day of admission, otherwise, please mark "no data".*

**Pancreatic:**                      yes                      no                      no data  
if yes:                      fluid collections /pseudocyst / necrosis / diabetes

**Organ failure:**                      yes                      no  
if yes:,                      lung /heart / kidney /other

**Death:**                      yes                      no  
If yes: the exact date of death: ..... e.g. 10.25 or 22.45

**7. Epicrisis** *A short summary (what happened with the patient after the hospitalization, any recommended control examinations, surgery).*

.....  
.....

**DATE:**

YEAR: ..... MONTH: ..... DAY: ..... HOUR ..... MIN: .....

**NAME OF THE DOCTOR** : .....**SIGNATURE:** .....

THE RCT IS ORGANIZED BY THE HUNGARIAN PANCREATIC STUDY GROUP

**HPSG chair and leader of the Steering Committee:**

Péter Hegyi **Tel:** +36 70 375 1031 **e-mail:** p.hegyi@tm-pte.org

**Principal Investigator:**

Kata Márta **Tel:** +36 20 211 5868 **e-mail:** k.marta@tm-pte.org

**7/24 HOT LINE**

**+36 30 292 5534. ☎61180**
